# Supplementary material
Source: publisher figshare collection journal article supplement (https://acs.figshare.com/ndownloader/files/5689509)
Supplement: Supplementary file 1 [file 5689509]

## Supporting Information:

Figure S1

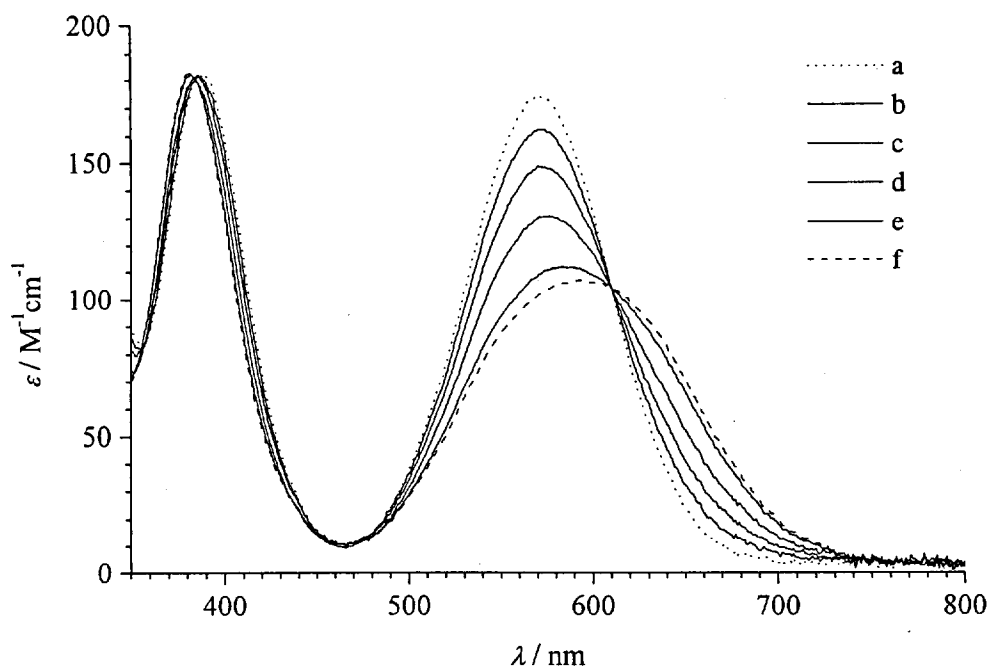

Figure Captions

**Figure S1:** Variation at 25 °C with acid concentration of the optical spectra of solutions of the  $[\text{Co}([\text{3}^5]\text{adz})(\text{CO}_3)]\text{ClO}_4$  salt (**1c**),  $I = 5.0 \text{ M}$  ( $\text{CF}_3\text{SO}_3\text{H} / \text{CF}_3\text{SO}_3\text{Na}$ ). From these spectra  $K_a$  was determined to  $0.54(2) \text{ M}^{-1}$  at 25 °C. **a:** 5.0 M  $\text{CF}_3\text{SO}_3\text{Na}$ . **b:** 0.1 M  $\text{CF}_3\text{SO}_3\text{H} / 4.9 \text{ M}$   $\text{CF}_3\text{SO}_3\text{Na}$ . **c:** 0.3 M  $\text{CF}_3\text{SO}_3\text{H} / 4.7 \text{ M}$   $\text{CF}_3\text{SO}_3\text{Na}$ . **d:** 0.9 M  $\text{CF}_3\text{SO}_3\text{H} / 4.1 \text{ M}$   $\text{CF}_3\text{SO}_3\text{Na}$ . **e:** 5.0 M  $\text{CF}_3\text{SO}_3\text{H}$ . **f:** calculated spectrum for the  $[\text{Co}([\text{3}^5]\text{adz})(\text{HCO}_3)]^{2+}$  ion (**2**).

**Figure S2:** View of the cation in  $[\text{Co}([\text{3}^5]\text{adz})(\text{SO}_4)]\text{AsF}_6 \cdot \text{H}_2\text{O}$  (**3a**).

## Appendix S1:

### X-ray Crystal Structures of $[\text{Co}([\text{3}^5]\text{adz})(\text{SO}_4)]\text{AsF}_6 \cdot \text{H}_2\text{O}$ (**3a**).

Crystal data for the compound are listed in Table 1.

Compound **3a** consists of  $[\text{Co}([\text{3}^5]\text{adz})(\text{SO}_4)]^+$  and  $\text{AsF}_6^-$  ions and one water molecule. Bond lengths and angles of the coordination sphere around the cobalt ion are listed in Table 2. The  $\text{SO}_4^{2-}$  ligand is coordinated as bidentates giving a *cis* configuration as found in the nickel complexes with the ligand  $[\text{2}^4.\text{3}^1]\text{adamanzane}$ ,<sup>26</sup> and with  $[\text{3}^5]\text{adamanzane}$ .<sup>25</sup> In the present structure, the angles around the cobalt ion show substantial distortions with respect to those of a regular octahedron. This is mainly due to the very small angle O(1)-Co-O(2) of  $72.56(13)^\circ$ . As a consequence, the  $\text{SO}_4^{2-}$  is distorted from regular tetrahedral symmetry, the O(1)-S-O(1)<sup>i</sup> (<sup>i</sup> =  $x, \frac{1}{2} - y, z$ ) being  $99.0(2)^\circ$ . These value is similar to that found in  $[(\text{trpn})\text{Co}(\eta^2\text{-SO}_4)]\text{ClO}_4 \cdot \text{H}_2\text{O}$ .<sup>60</sup>

As found in  $[(\text{trpn})\text{Co}(\eta^2\text{-SO}_4)]\text{ClO}_4 \cdot \text{H}_2\text{O}$ <sup>60</sup> the S-O bonds in  $[\text{Co}([\text{3}^5]\text{adz})(\text{SO}_4)]\text{AsF}_6 \cdot \text{H}_2\text{O}$  (**3a**) are shorter to the non-coordinating oxygens (1.436(4) and 1.449(4) Å) than to the coordinated oxygens (1.515(2) Å).

In the present three structures the Co-N bonds are similar and so are the Co-O bond lengths.

In the sulphato compound (**3a**) the two rings containing N(1) are in a chair conformation, the two rings involving N(3) are in a twist-boat form, whereas the fifth ring is in a half-chair conformation.

The N(2)⋯N(4) distance between the bridgehead nitrogen atoms is 3.211(5) Å (here it is the N(2)⋯N(2)<sup>i</sup> distance, (<sup>i</sup> =  $x, \frac{1}{2} - y, z$ )). The N(1)⋯N(3) distance is 4.023(5) Å. The hydrogen atoms attached to N(1) and N(3) are in the structure oriented away from the inorganic ligand. The hydrogen atom at N(1) is involved in a hydrogen bond with O(2) ( $\frac{1}{2} + x, \frac{1}{2} - y, \frac{3}{2} - z$ ) of 2.981(5) Å (D⋯A), and between the hydrogen atom H(1Ow) attached to Ow and O(3) ( $1 + x, y, z$ ) there is a hydrogen bond of 2.682(7) Å (D⋯A).
